# Supplementary material
Source: PubMed Central journal article supplement (PMC3033290)
Supplement: 1019443108_pnas.201019443SI.pdf [file 1019443108_pnas.201019443SI.pdf]

# Supporting Information

Keramati et al. 10.1073/pnas.1019443108

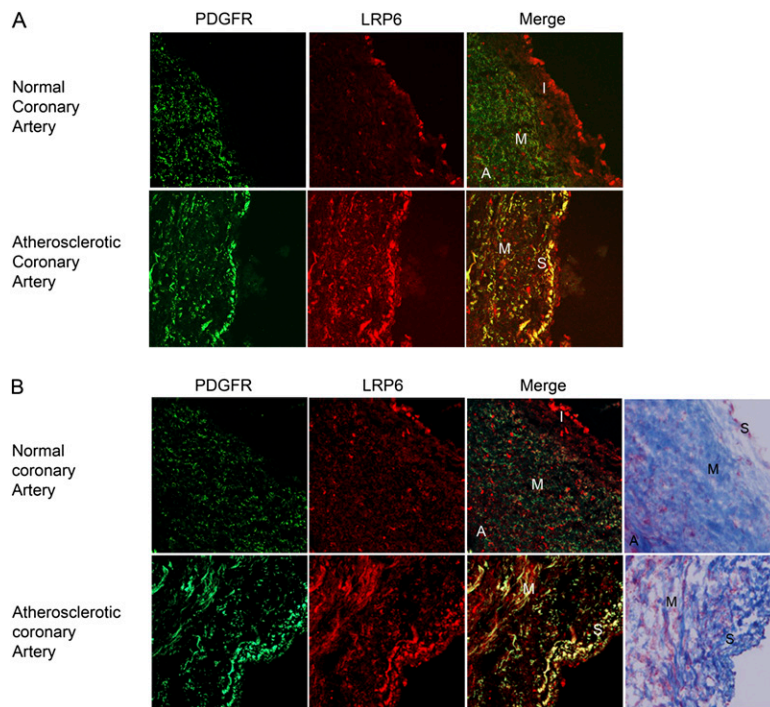

**Fig. S1.** (A and B) PDGF receptor  $\beta$  (PDGFR- $\beta$ ) and LDL receptor-related protein 6 (LRP6) expression in normal and atherosclerotic coronary arteries. Cross-sections of normal arteries (Upper) and atherosclerotic lesions (Lower) stained for PDGFR and LRP6 are shown. B also shows the Sudan staining of the normal and the atherosclerotic vessels for better orientation. To show PDGFR/LRP6 expression, only a cell-rich segment of the atherosclerotic lesion that lacks lipid core is shown. A, adventitia; I, intima; M, muscularis; S, subintima.

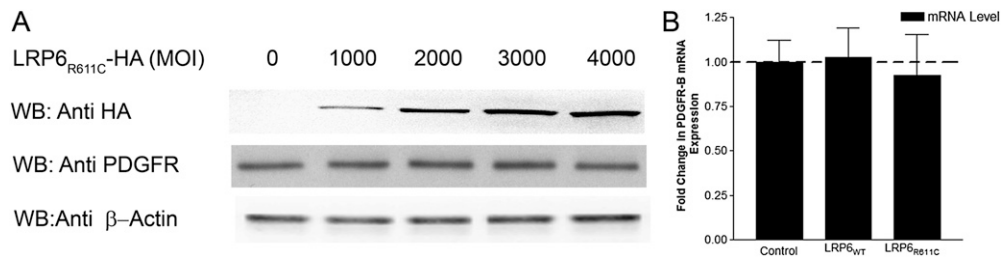

**Fig. S2.** Dose effect of LRP6<sub>R611C</sub> on endogenous PDGFR- $\beta$  expression. (A) No significant changes in PDGFR- $\beta$  expression levels were noted with LRP6<sub>R611C</sub>. (B) PDGFR- $\beta$  mRNA expression levels. There was no difference in mRNA expression levels of PDGFR- $\beta$  in cells infected with empty vector or with adenovirus vector expressing LRP6<sub>WT</sub> or LRP6<sub>R611C</sub>.

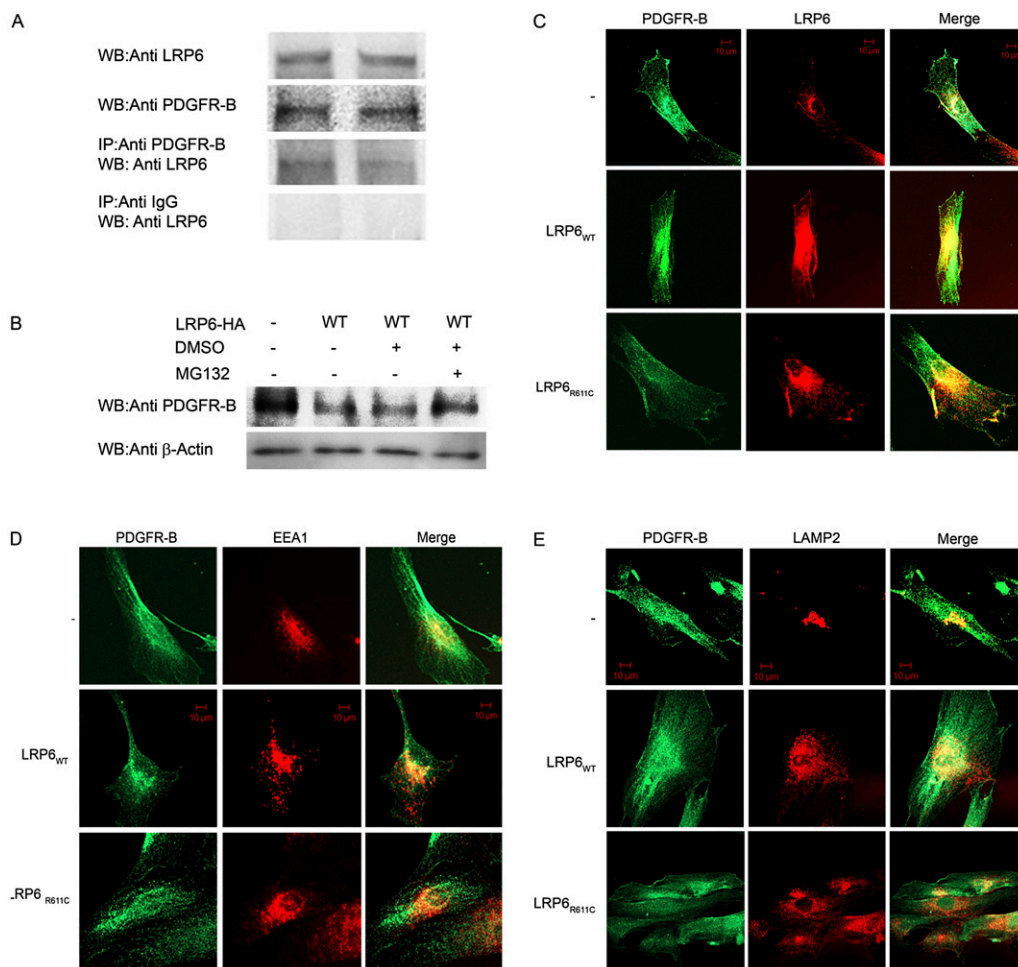

**Fig. S3.** (A) Coimmunoprecipitation of the native LRP6 and PDGFR in human aortic smooth muscle cells. (B) Inhibition of the proteosomal degradation with MG132 partially rescues reduced expression of PDGFR- $\beta$  ( $P = 0.02$ ). (C–E) Colocalization of LRP6, PDGFR- $\beta$ , early endosomal antigen 1 (EEA1), and (lysosomal-associated membrane protein 2) Lamp2 in unstimulated primary aortic smooth muscle cells infected with plasmids expressing LRP6<sub>WT</sub> and LRP6<sub>R611C</sub> and empty plasmids. LRP6<sub>WT</sub> and LRP6<sub>R611C</sub> both colocalize with PDGFR- $\beta$  (C) and EEA1 (D). Colocalization of PDGFR- $\beta$  with the lysosomal marker LAMP2 (E) was observed in more than two-thirds of the cells overexpressing LRP6<sub>WT</sub> and was significantly higher than in cells overexpressing LRP6<sub>R611C</sub> and cells infected with empty vector.

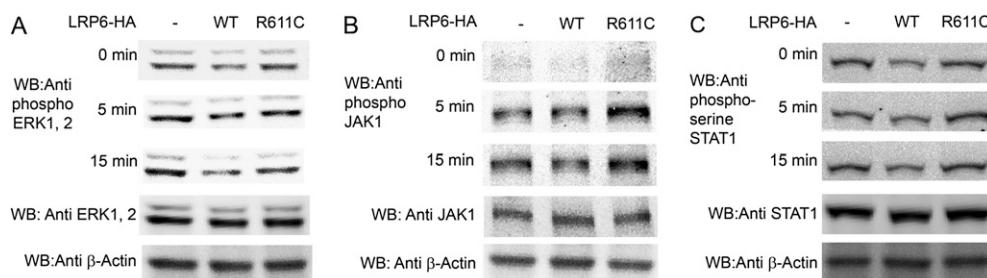

**Fig. S4.** Expression levels of PDGF signal peptides. Phosphorylation of (A) ERK1/2, (B) JAK1, and (C) STAT1 is significantly lower in cells expressing LRP6<sub>WT</sub> than in uninfected cells after stimulation with PDGF ( $P = 0.02$ , 0.03, and 0.01, respectively). In comparison, JAK1 phosphorylation is increased considerably in cells expressing LRP6<sub>R611C</sub> as compared with LRP6<sub>WT</sub> ( $P < 0.01$ ) and uninfected cells ( $P < 0.05$ ).
